# Supplementary material for: Synthesis and Micellization Behavior of Amphiphilic Block Copolymers of Poly(N-vinyl Pyrrolidone) and Poly(Benzyl Methacrylate): Block versus Statistical Copolymers
Source: MDPI journal article supplement (doi:10.3390/polym15092225), 2023-05-08
Supplement: s1 [file s1]

# Supplementary Material: Synthesis and Micellization Behavior of Amphiphilic Block Copolymers of Poly(N-vinyl Pyrrolidone) and Poly(Benzyl Methacrylate): Block versus Statistical Copolymers

Nikoletta Roka and Marinos Pitsikalis

## Supporting Information Section

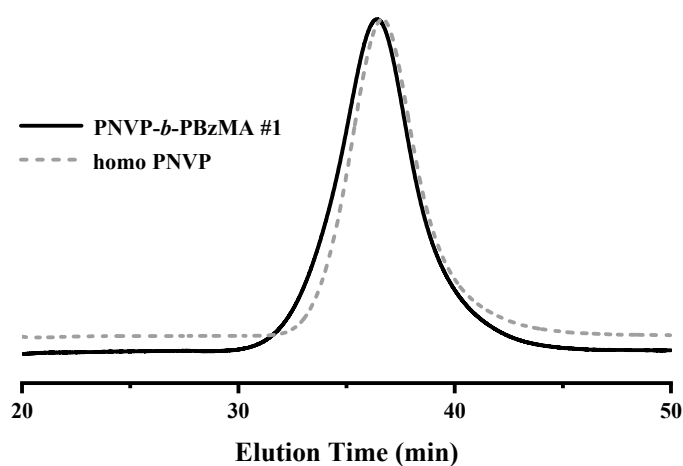

Figure S1: SEC traces from the synthesis of the block copolymer PNVP-*b*-PBzMA#1

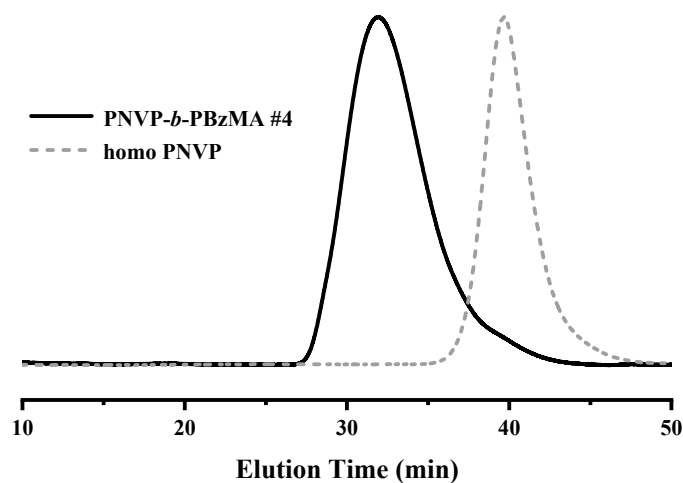

Figure S2: SEC traces from the synthesis of the block copolymer PNVP-*b*-PBzMA#4

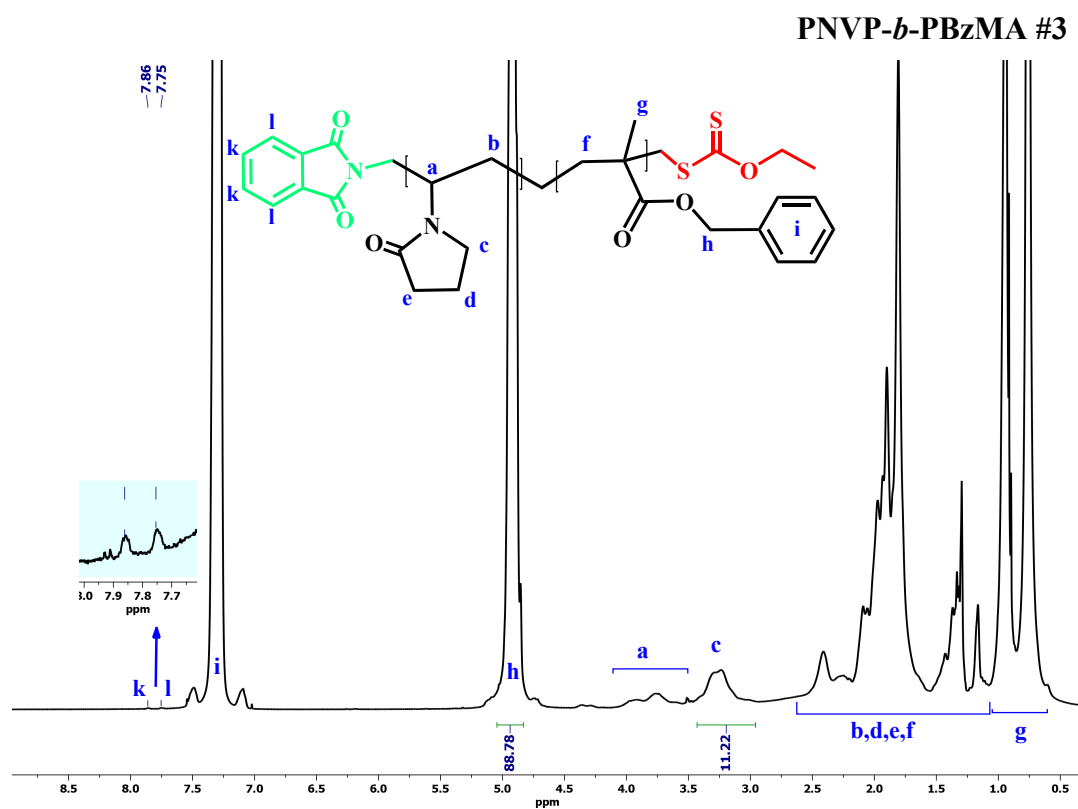

Figure S3. 400 MHz  $^1\text{H}$  NMR spectrum of the block copolymer PIBMA-*b*-PNVP#3

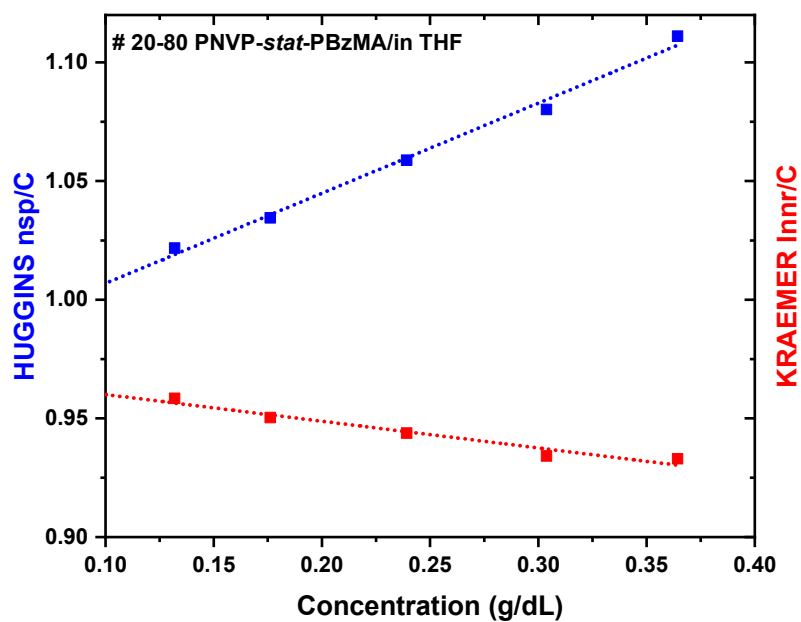

Figure S4. Dilute solution viscometry plots of the sample 20/80

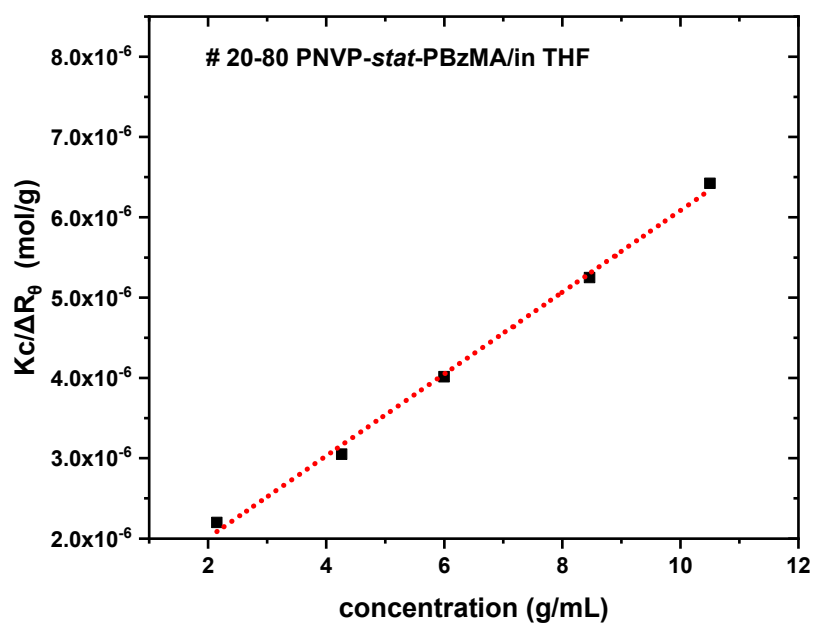

Figure S5. SLS plots of the sample 20-80

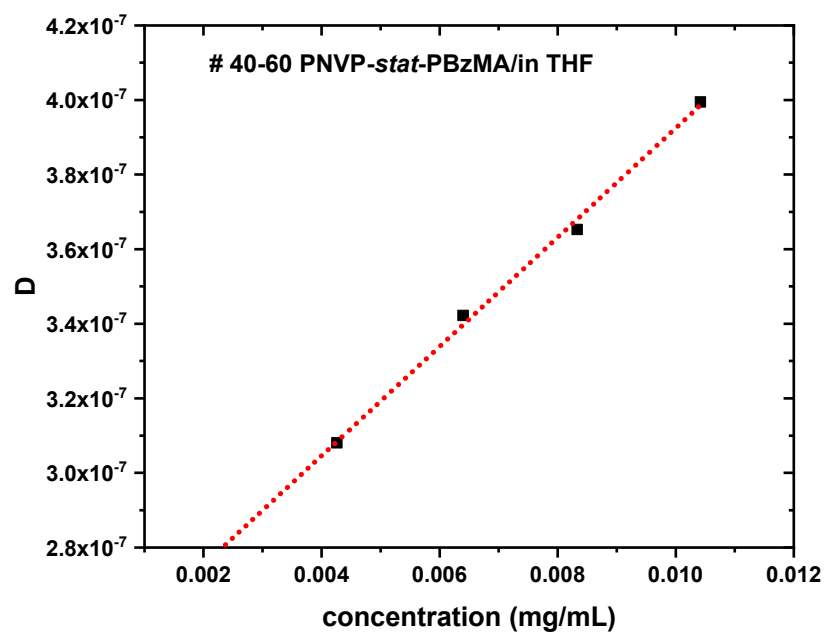

Figure S6. DLS plots of the sample 40-60

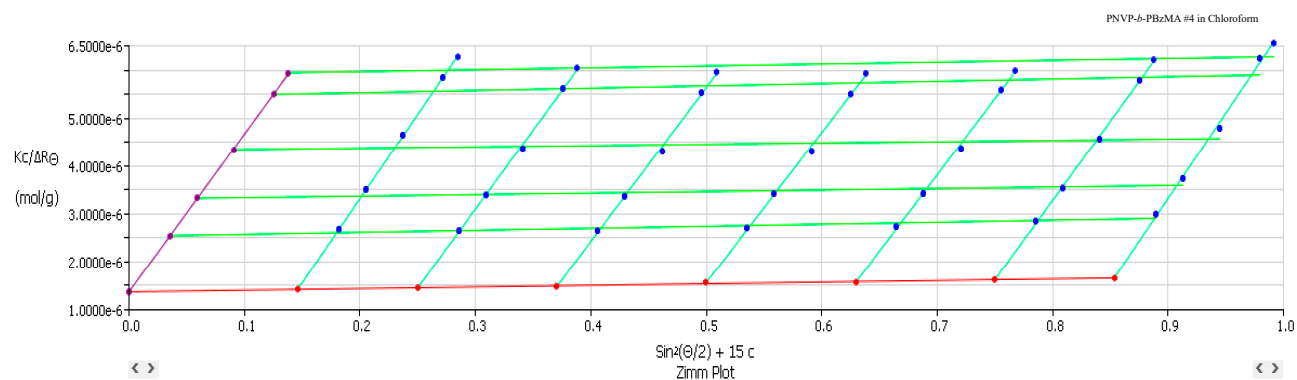

Figure S7. SLS plots of the sample PNVP-*b*-PBzMA#4 in CHCl<sub>3</sub>.

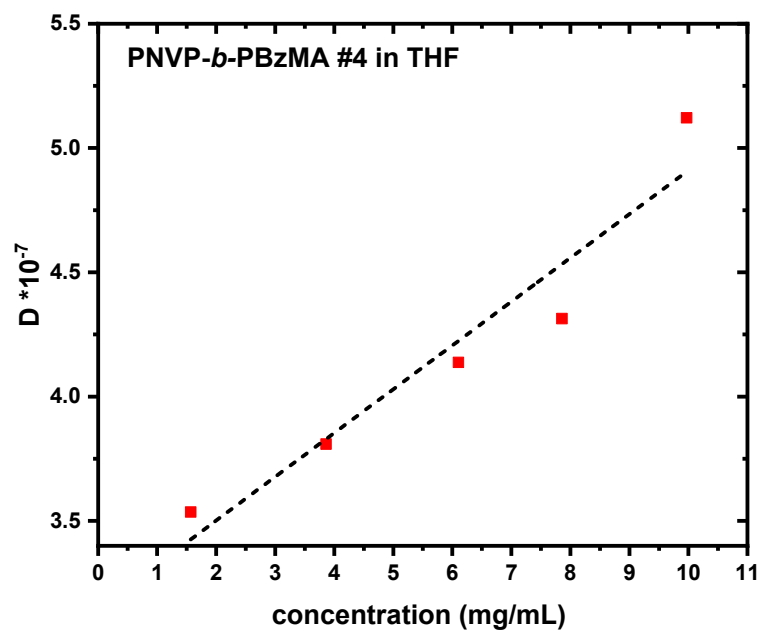

Figure S8. DLS plots of the sample PNVP-*b*-PBzMA#4 in THF

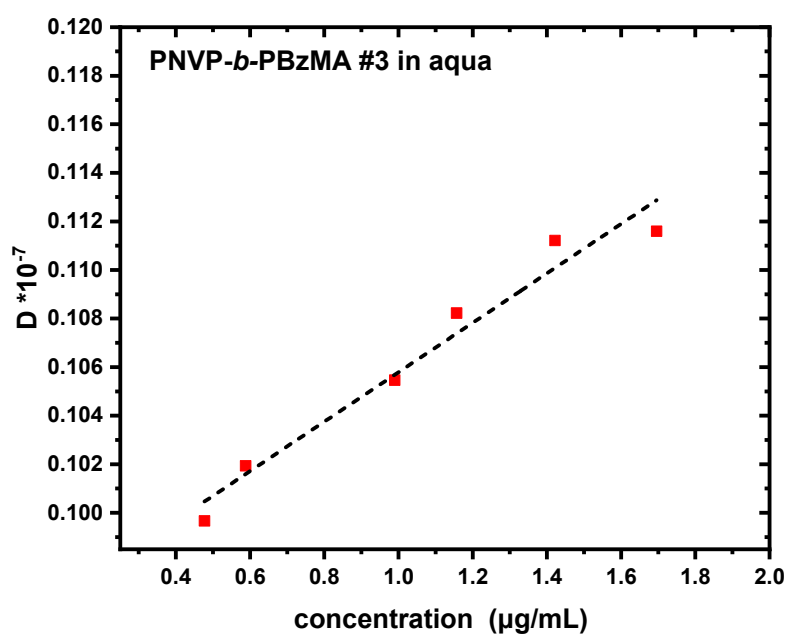

Figure S9. DLS plots of the sample PNVP-*b*-PBzMA#3 in aqueous solution

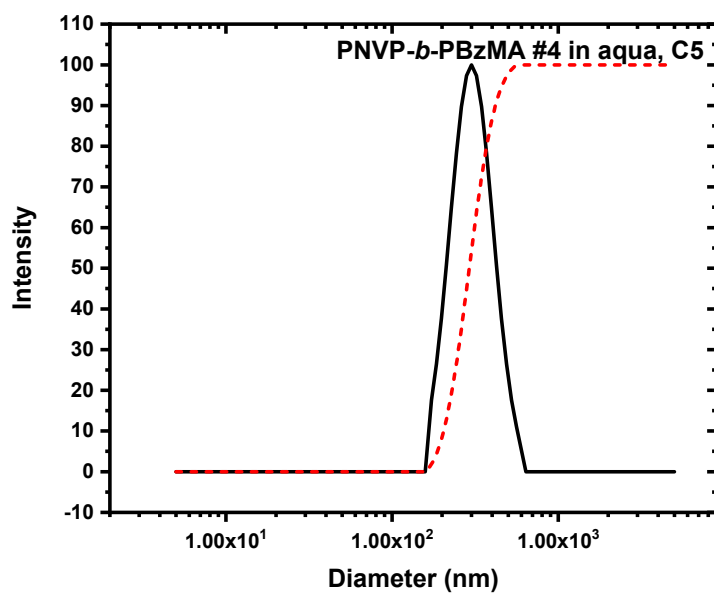

Figure S10. CONTIN plot for the sample PNVP-*b*-PBzMA#4 in aqueous solution

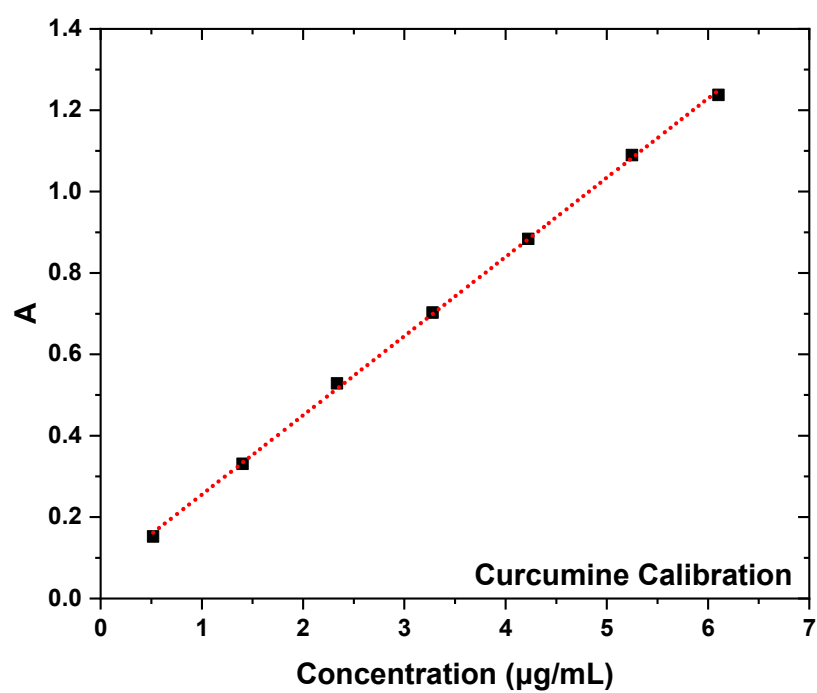

Figure S11. Calibration curve for curcumin from UV-Vis spectroscopy measurements at 423.50 nm
